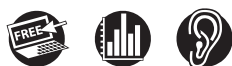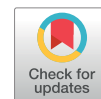

# Clinical Impact of ITCA 650, a Novel Drug-Device GLP-1 Receptor Agonist, in Uncontrolled Type 2 Diabetes and Very High Baseline HbA<sub>1c</sub>: The FREEDOM-1 HBL (High Baseline) Study

Diabetes Care 2018;41:613–619 | <https://doi.org/10.2337/dc17-1519>

Robert R. Henry,<sup>1</sup> Julio Rosenstock,<sup>2</sup>  
Douglas S. Denham,<sup>3</sup> Prakash Prabhakar,<sup>4</sup>  
Lise Kjems,<sup>4</sup> and Michelle A. Baron<sup>4</sup>

## OBJECTIVE

ITCA 650 is a subdermal osmotic mini-pump that continuously delivers exenatide subcutaneously for 3–6 months. The efficacy, safety, and tolerability of ITCA 650 added to diet and exercise alone or combined with metformin, sulfonylurea, or thiazolidinedione monotherapy or a combination of these drugs was evaluated in poorly controlled patients with type 2 diabetes (T2D) who were ineligible for participation in a placebo-controlled study (FREEDOM-1) because of severe hyperglycemia (HbA<sub>1c</sub> >10% [86 mmol/mol]).

## RESEARCH DESIGN AND METHODS

This 39-week, open-label, phase 3 trial enrolled patients aged 18–80 years with HbA<sub>1c</sub> >10% to ≤12% (86–108 mmol/mol) and BMI 25–45 kg/m<sup>2</sup>. Patients received ITCA 650 20 µg/day for 13 weeks, then 60 µg/day for 26 weeks. The primary end point was change in HbA<sub>1c</sub> at week 39.

## RESULTS

Sixty patients were enrolled. At baseline, mean HbA<sub>1c</sub> was 10.8% (94.7 mmol/mol) and mean (± SD) duration of diabetes was 8.6 (± 5.3) years. At week 39, there was a mean reduction in HbA<sub>1c</sub> of −2.8% (−30.3 mmol/mol; *P* < 0.001 vs. baseline) and in body weight of −1.2 kg (*P* = 0.105), and 25% of patients achieved HbA<sub>1c</sub> <7% (53 mmol/mol). A reduction in HbA<sub>1c</sub> of ≥1% (≥10.9 mmol/mol) occurred in 90% of patients. The most common adverse events were nausea, vomiting, diarrhea, and headache. Gastrointestinal adverse events were generally transient and subsided over time; only 4 patients (6.7%) discontinued for gastrointestinal events.

## CONCLUSIONS

Treatment with ITCA 650, the first injection-free glucagon-like peptide 1 receptor agonist, resulted in significant improvements in glycemic control in poorly controlled long-standing T2D patients with a high baseline HbA<sub>1c</sub> >10%.

<sup>1</sup>VA San Diego Healthcare System, San Diego, CA, and University of California, San Diego, La Jolla, CA

<sup>2</sup>Dallas Diabetes Research Center at Medical City, Dallas, TX

<sup>3</sup>Clinical Trials of Texas, Inc., San Antonio, TX

<sup>4</sup>Intarcia Therapeutics, Inc., Boston, MA

Corresponding author: Robert R. Henry, [rrhenry@outlook.com](mailto:rrhenry@outlook.com).

Received 24 July 2017 and accepted 10 December 2017.

Clinical trial reg. no. NCT01785771, [clinicaltrials.gov](http://clinicaltrials.gov).

This article contains Supplementary Data online at <http://care.diabetesjournals.org/lookup/suppl/doi:10.2337/dc17-1519/-/DC1>.

This article is featured in a podcast available at <http://www.diabetesjournals.org/content/diabetes-core-update-podcasts>.

© 2018 by the American Diabetes Association. Readers may use this article as long as the work is properly cited, the use is educational and not for profit, and the work is not altered. More information is available at <http://www.diabetesjournals.org/content/license>.

Over 50% of patients with type 2 diabetes (T2D) have inadequate glycemic control (1,2) despite the availability of an increasing number of effective therapies (3,4). Severely hyperglycemic patients may contribute disproportionately to the burden of diabetes (5), and most guidelines recommend initiation of insulin therapy. In the National Health and Nutrition Examination Survey (NHANES), 12.6% of patients with T2D had  $HbA_{1c} > 9\%$  (75 mmol/mol) (1). A Canadian registry of diabetes specialty clinics reported that 16.1% of patients with T2D had an  $HbA_{1c}$  level of at least 9% (75 mmol/mol) (5). Between 38% and 54% of patients have appropriate adherence to antidiabetes drugs as defined by percent of patients with  $\geq 80\%$  of days covered (6). Medication nonadherence limits the realization of the full efficacy of therapy, results in poor health outcomes, and has a negative impact on society as a result of increased health care resource utilization and cost (4,7,8). Nonadherence to therapy, especially insulin or injectable glucagon-like peptide 1 receptor agonists (GLP-1 RAs), may be the most significant contributing factor to poor glycemic control in a high-risk group with severe hyperglycemia (9).

GLP-1 RAs have emerged as important therapeutic agents for the treatment of T2D, lowering glucose and promoting weight loss while posing a low risk of hypoglycemia (10) because of their glucose-dependent effect on insulin secretion (11). Although the GLP-1 agonists produce significant improvements in glycemic control, the disadvantage of all currently approved GLP-1 agonists is the need for daily or weekly injections, resulting in low adherence to and persistence of therapy. Indeed, approximately 35% of patients were adherent to injectable GLP-1 agonist therapy during a 12-month period (12), and persistence rates of 30–36% were reported over a 12-month follow-up (6,13).

Effective T2D therapies must be efficacious and safe while also addressing the issue of medication nonadherence. More innovative approaches for drug delivery are needed in order to improve long-term glycemic control and patient outcomes.

ITCA 650 provides an innovative method of delivering exenatide, which has the potential to address important and prevalent unmet medical needs of patients with T2D by improving and sustaining glycemic control over time. ITCA

650 is a drug-device combination product in development for the treatment of T2D (Supplementary Fig. 1). It consists of a small titanium matchstick-sized osmotic mini-pump that delivers a continuous subcutaneous infusion of exenatide for extended periods (14,15). Placement and removal of ITCA 650 are performed by trained health care professionals using local anesthesia during a brief office procedure that has been well tolerated by patients. The sterile mini-pump is placed in the subdermis of the abdominal wall using a placement tool and is removed or replaced through a small ( $\sim 5$  mm) incision that is closed with Steri-Strips. ITCA 650 can be easily removed in a physician's office to rapidly terminate drug administration if necessary, as exenatide levels fall rapidly within 24 h after removal (16).

In a randomized, 24-week, open-label, phase 2 study, patients with T2D inadequately controlled with metformin who were treated with ITCA 650 20  $\mu\text{g/day}$  for 12 weeks followed by 60  $\mu\text{g/day}$  for 12 weeks experienced significant reductions in  $HbA_{1c}$  of  $-1.4\%$  ( $-8.2$  mmol/mol) and in body weight of  $-3.1$  kg after the 24-week treatment period (17); these effects were maintained during a 24-week extension (18). In a randomized, double-blind, placebo-controlled phase 3 study, ITCA 650 demonstrated significant reductions in  $HbA_{1c}$  and body weight compared with placebo and was well tolerated (19). We report here the results from the open-label cohort of patients from this study who were not eligible to participate in the placebo-controlled trial because of baseline  $HbA_{1c} > 10\%$  (86 mmol/mol).

## RESEARCH DESIGN AND METHODS

The study was approved by an institutional review board and conducted in accordance with the Declaration of Helsinki and the International Council for Harmonisation Guideline for Good Clinical Practice. All patients gave written informed consent. A Data Monitoring Committee was responsible for evaluating cumulative safety data at regular intervals. Independent cardiovascular end point adjudication and clinical events committees reviewed and adjudicated suspected major adverse cardiovascular events, thyroid cancer, pancreatic cancer, and pancreatic events in a blinded manner.

Investigative site personnel were provided with kits containing all supplies

necessary to conduct the procedures and were trained and certified via a standardized online and hands-on training program prior to the initiation of any study procedures.

## Study Design

This open-label phase 3 study was conducted at 32 clinical sites in the U.S. and consisted of a 4-week screening period, a 39-week treatment period, and a 4-week posttreatment follow-up period (Supplementary Fig. 2). Enrolled patients had been screened for participation in the FREEDOM-1 trial, a 39-week randomized, double-blind, placebo-controlled trial with ITCA 650 (19) but were excluded because they did not meet glycemic inclusion criteria of  $HbA_{1c} \leq 10\%$  (86 mmol/mol).

Patients were initially treated with ITCA 650 20  $\mu\text{g/day}$  for 13 weeks. The device was placed subdermally in the abdominal wall using local anesthesia. At the 13-week visit, the 20  $\mu\text{g/day}$  mini-pump was removed and replaced, usually at the same site, with a 60  $\mu\text{g/day}$  mini-pump for the subsequent 26 weeks.

## Patient Selection

Eligible patients were males and females with T2D, age 18 to 80 years, with  $HbA_{1c} > 10\%$  (86 mmol/mol) and  $\leq 12\%$  (108 mmol/mol), fasting plasma glucose (FPG)  $\leq 300$  mg/dL, BMI  $\geq 25$  to  $\leq 45$  kg/m<sup>2</sup>, and serum calcitonin  $< 50$  ng/L who were receiving stable ( $\geq 3$  months prior to screening) treatment with diet and exercise alone or with metformin ( $\geq 1,500$  mg/day), sulfonylureas (SUs) ( $\geq$  half maximal dose), or pioglitazone ( $\geq 30$  mg/day) monotherapy or in combination.

Patients were excluded if they previously had received a GLP-1 RA; took dipeptidyl peptidase 4 (DPP-4) inhibitors,  $\alpha$ -glucosidase inhibitors, meglitinides, sodium-glucose cotransporter 2 (SGLT2) inhibitors, or insulin (except short-term treatment) within 3 months of screening; or had an estimated glomerular filtration rate  $< 60$  mL/min/1.73 m<sup>2</sup>.

Patients were required to maintain their baseline dose of background medication throughout the study. Investigators could titrate the dose of SUs downward to avoid and/or treat hypoglycemia and were expected to assess contributing factors for hypoglycemia.

Patients with unacceptable hyperglycemia were expected to receive additional

antidiabetes treatment and continue in the study. Criteria for rescue therapy became more stringent as the study progressed beyond week 13 such that by week 26 additional antidiabetes treatment was required if HbA<sub>1c</sub> was >8.5% (63.9 mmol/mol) (see Supplementary Data). Insulin glargine titrated to target FPG was recommended; additional oral antidiabetes medication could be added instead, at the discretion of the investigator, but DPP-4 inhibitors, other GLP-1 RAs, and SGLT2 inhibitors were not allowed for rescue therapy.

### Study Assessments

Blood samples were collected at prespecified time points and analyzed at the central laboratory (Quintiles Laboratories Ltd., Marietta, GA) to determine levels of HbA<sub>1c</sub>, FPG, fasting lipids (total cholesterol, LDL cholesterol, HDL cholesterol, triglycerides, apolipoprotein B-100), adiponectin, insulin, and high-sensitivity C-reactive protein. Safety assessments included adverse events (AEs), clinical laboratory measurements (chemistry including amylase, lipase, calcitonin, and thyroid-stimulating hormone, hematology, and urinalysis), 12-lead electrocardiogram, vital signs, and physical examinations. Antiexenatide antibodies (ADAs) were determined in human serum samples using a validated ELISA (Charles River Laboratories [formerly WIL Research], Skokie, IL).

The primary end point was the change from baseline in HbA<sub>1c</sub> at week 39. Key secondary end points were change in body weight and percentage of patients achieving HbA<sub>1c</sub> <7% (<53 mmol/mol).

AEs of special interest included major adverse cardiovascular events, gastrointestinal AEs (nausea/vomiting), pancreatitis, pancreatic cancer, thyroid cancer, hypoglycemia, and procedural/application site AEs. Hypoglycemia was defined as minor if symptoms were accompanied by plasma glucose <60 mg/dL (3.3 mmol/L). A major hypoglycemic event was defined when hypoglycemic symptoms required the assistance of a third party to actively administer resuscitative measures.

### Statistical Methods

The sample size was based on the assumption that a reduction of at least 0.7% (7.1 mmol/mol) in HbA<sub>1c</sub> would occur after 39 weeks of treatment; a CI with a half-width of 0.7% (7.1 mmol/mol) was desired. Assuming an interpatient standard

deviation of 1.25 and a dropout rate of up to 30% through the end of the 39-week treatment period, 51 patients were needed for a 90% power to achieve the desired precision.

The safety (SAF) population included all patients who had a procedure started for ITCA 650 placement. The modified intent-to-treat (mITT) population included all subjects from the SAF population who had a valid baseline and at least one post-baseline HbA<sub>1c</sub> value. The efficacy evaluable population included the patients in the mITT population who had baseline and week 39 HbA<sub>1c</sub> values, did not require rescue therapy, and had no major protocol deviations through week 39. All safety analyses were based on the SAF population, and all efficacy analyses were based on the mITT population. The primary end point was mean change from baseline to week 39 in HbA<sub>1c</sub>. The last observation carried forward (LOCF) method was used to address missing values for efficacy. Patients that terminated early from study treatment were included with their last postbaseline HbA<sub>1c</sub> value carried forward. Patients who took rescue therapy were included with their last postbaseline HbA<sub>1c</sub> value before beginning rescue therapy carried forward.

The analysis included the 95% CI and each time point, and a one-sample *t* test was used to evaluate whether the change from baseline was different from 0. The effect of age, sex, and background treatment (e.g., SU or thiazolidinedione monotherapy) on the change in HbA<sub>1c</sub> was explored through linear models. Mean change in body weight as a secondary end point was analyzed similarly to the primary end point. Mixed effects models for repeated measures, another method for handling missing data, were conducted for HbA<sub>1c</sub> and weight as sensitivity analyses. The proportion of patients attaining an HbA<sub>1c</sub> level of <7% (53 mmol/mol) at week 39 was determined using a logistic regression model with proportion of patients with HbA<sub>1c</sub> <7% (53 mmol/mol) at LOCF end point as the outcome variable. Other end points, such as changes in blood lipids (total, LDL, and HDL cholesterol, triglycerides, and apolipoprotein B-100), systolic and diastolic blood pressure, and FPG at week 39, were evaluated as well.

Safety was assessed primarily through summaries of AEs, hypoglycemic episodes, clinical laboratory tests, physical examinations, vital signs, electrocardiograms, and the presence of ADAs.

**Table 1—Baseline demographic and clinical characteristics, safety population (N = 60)**

| Characteristic                     | Value                   |
|------------------------------------|-------------------------|
| Age, years                         | 51.9 ± 10.2             |
| Age range, years                   | 25–70                   |
| Age ≥65 years                      | 9 (15.0)                |
| Male                               | 34 (56.7)               |
| Race                               |                         |
| White                              | 48 (80.0)               |
| Black or African American          | 8 (13.3)                |
| Other                              | 4 (6.7)                 |
| Hispanic or Latino                 | 23 (38.3)               |
| Body weight, kg                    | 92.9 ± 18.8             |
| BMI, kg/m <sup>2</sup>             | 32.0 ± 4.9              |
| BMI ≥30 kg/m <sup>2</sup>          | 38 (63.3)               |
| HbA <sub>1c</sub> , % (mmol/mol)   | 10.8 ± 0.7 (94.7 ± 7.1) |
| FPG (mmol/L)                       | 13.7 ± 3.0              |
| Estimated GFR (mL/min/BSA)         | 96.2 ± 21.5             |
| Years since diabetes diagnosis     | 8.5 ± 5.3               |
| Antidiabetes treatment at baseline |                         |
| Diet and exercise                  | 18 (30.0)               |
| Metformin                          | 21 (35.0)               |
| SU                                 | 1 (1.7)                 |
| Metformin + SU                     | 19 (31.7)               |
| Metformin + SU + TZD               | 1 (1.7)                 |

Data are mean ± SD or *n* (%) unless otherwise indicated. BSA, body surface area; GFR, glomerular filtration rate; TZD, thiazolidinedione.

## RESULTS

Sixty patients were enrolled and treated with ITCA 650, and 59 (98.3%) had at least one postbaseline HbA<sub>1c</sub> result (mITT population). Fifty-two (86.7%) patients completed treatment for 39 weeks. Of the eight (13.3%) patients who discontinued, one (1.7%) withdrew consent, six (10.0%) withdrew for an AE, and one (1.7%) was lost to follow-up. Twenty (33.3%) patients received rescue therapy and continued in the study. The mean time to rescue was  $164.5 \pm 61.4$  days; over half of patients were rescued after week 26 based on protocol criteria requiring HbA<sub>1c</sub> to be  $\leq 8.5\%$  (63.9 mmol/mol).

Baseline demographic and clinical characteristics were representative of patients with long-standing poorly controlled T2D (Table 1). The mean baseline HbA<sub>1c</sub> was  $10.8\% \pm 0.7\%$  ( $94.7 \pm 7.1$  mmol/mol). Most patients were obese with diagnosed hypertension and dyslipidemia. The mean duration of diabetes was  $8.6 \pm 5.3$  years. Twenty-one patients (35%) were taking metformin monotherapy and 19 (32%) were on metformin and an SU. Approximately 30% of patients were not taking any antidiabetes medication at baseline, although most had previously received antidiabetes therapy.

## Efficacy

### Glycemic Control

A clinically meaningful significant decrease in HbA<sub>1c</sub> from baseline was observed in the mITT population. The mean  $\pm$  SD change from baseline to week 39 LOCF end point for HbA<sub>1c</sub> was  $-2.8 \pm 1.4\%$  (95% CI  $-3.1, -2.4$ ) ( $-30.3 \pm 15.5$  mmol/mol [95% CI  $-34.4, -26.3$ ];  $P < 0.001$  vs. baseline). The repeated measures sensitivity analysis was consistent with the primary analysis, resulting in an adjusted mean change ( $\pm$  SE) in HbA<sub>1c</sub> of  $-3.0 \pm 0.2\%$  ( $-9.3 \pm 2.6$  mmol/mol). The efficacy evaluable population (33 patients) had a mean  $\pm$  SD change from baseline in HbA<sub>1c</sub> of  $-3.4 \pm 1.3\%$  (95% CI  $-3.9, -2.9$ ) ( $-13.7 \pm 9.3$  mmol/mol [95% CI  $-19.1, -8.2$ ];  $P < 0.001$  vs. baseline).

Significant reductions in HbA<sub>1c</sub> were seen as early as week 6 after starting treatment (Fig. 1A), continued through the dose escalation at week 13, reached a plateau at week 32, and persisted through week 39. In the mITT population, the mean  $\pm$  SD change from baseline to week 39 LOCF end point for FPG

was  $-61 \pm 72$  mg/dL ( $-3.4 \pm 4.0$  mmol/L [95% CI  $-4.5, -2.4$ ];  $P < 0.001$  vs. baseline).

### Proportion of Patients With HbA<sub>1c</sub> <7% and Other HbA<sub>1c</sub> Analyses

At week 39, 15 patients (25.4% [95% CI 15.0, 38.4]) reached the HbA<sub>1c</sub> goal of  $<7\%$  (53 mmol/mol) and 11 patients (18.6% [95% CI 9.7, 30.9]) achieved an HbA<sub>1c</sub> level of  $\leq 6.5\%$  (48 mmol/mol). The proportions of patients with a reduction in HbA<sub>1c</sub> of  $\geq 2\%$  (16.4 mmol/mol) and  $\geq 3\%$  (9.3 mmol/mol) were 73% and 46%, respectively (Fig. 1B). Predefined subgroup analyses revealed similar statistically significant ( $P < 0.001$  vs. baseline) reductions in HbA<sub>1c</sub> by background therapy.

### Change in Body Weight

The mean  $\pm$  SD change from baseline to week 39 for body weight in the mITT population was  $-1.2 \pm 5.8$  kg (95% CI  $-2.7, 0.3$ ;  $P = 0.105$  vs. baseline), which was not statistically significant.

### Other Outcomes

Changes from baseline for total cholesterol, LDL cholesterol, and HDL cholesterol were small and not significant. Mean  $\pm$  SD levels of triglycerides and apolipoprotein B-100 decreased by  $0.37 \pm 1.04$  mmol/L ( $P = 0.035$ ) and  $0.12 \pm 0.30$  g/L ( $P = 0.023$ ), respectively (Supplementary Table 1). Small, nonsignificant increases from baseline in both mean systolic ( $0.8 \pm 12.4$  mmHg) and diastolic ( $1.5 \pm 7.0$  mmHg) blood pressure

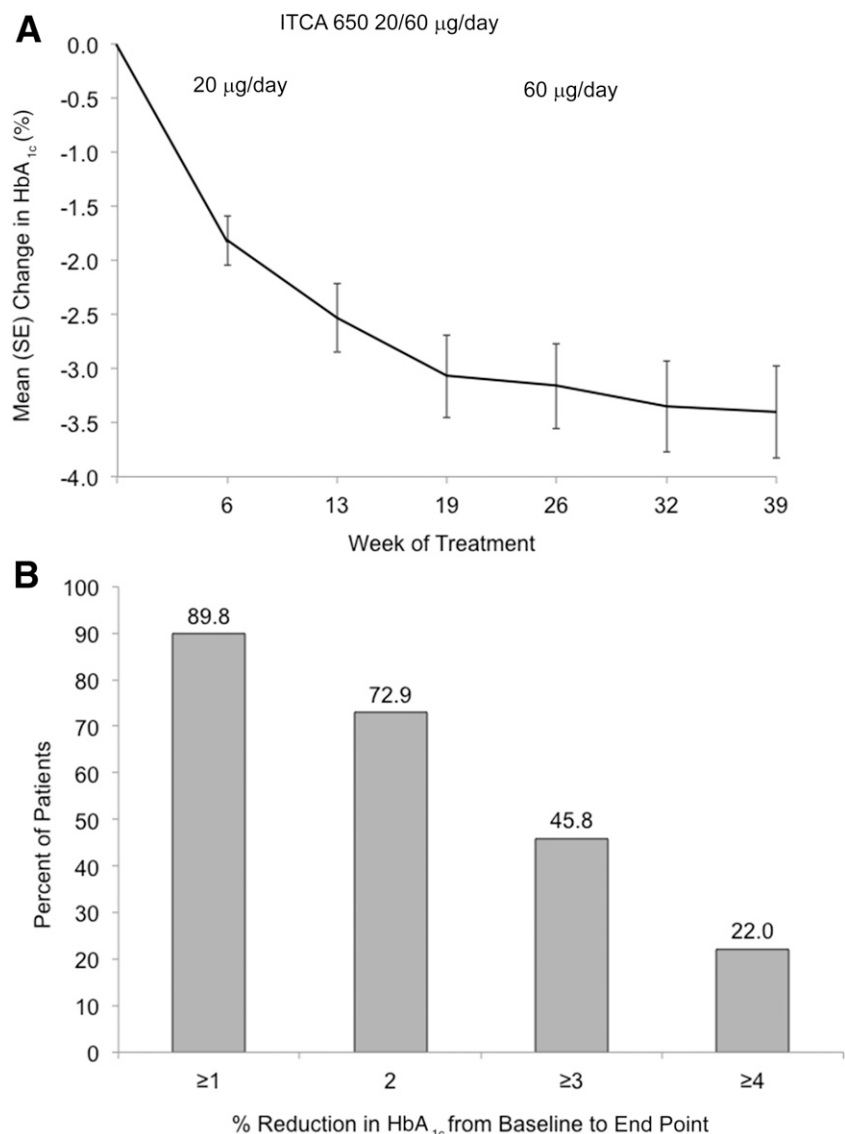

**Figure 1**—A: Mean (SE) change in HbA<sub>1c</sub> from day 0 to week 39 (mITT population, excludes data postrescue). B: Proportion of patients achieving HbA<sub>1c</sub> reductions (mITT population).

and in heart rate (4.5 bpm) were observed (Supplementary Table 2).

### Tolerability

The proportion of patients who reported at least one AE was 86.7%. Six serious AEs were reported in four patients, all considered by the investigator to be unrelated to ITCA 650 therapy. A total of eight patients (13.3%) discontinued from the study. Discontinuation due to AEs occurred in six patients (10.0%), four because of gastrointestinal disorders (nausea, vomiting, and diarrhea). The most common treatment-emergent AEs were gastrointestinal disorders (Table 2). The incidence of nausea was highest during the first week after treatment initiation and dose escalation and then diminished thereafter toward baseline (Fig. 2). Minor hypoglycemic events occurred in four (6.7%) patients, three in patients taking SUs as background therapy and one after initiation of rescue medication with insulin. No major hypoglycemic events were reported. There was one death (sudden cardiac death), which was not considered related to study treatment. No thyroid cancer, pancreatic cancer, or pancreatitis was observed.

The most frequently reported AEs related to the administration site were bleeding (15.0%), pain (6.7%), and bruising (5.0%), which were mostly mild, transient, and consistent with expectations from a minor medical procedure. There were 178 study procedures to place, replace, and remove study devices. Three removals were not successful at first attempt (reported as “device removal failed”), primarily due to initial placement of the device being too deep in the subcutaneous tissue. Two of the three removal procedures were successful during a subsequent attempt by the investigator, but one required referral to a specialist (assisted removal) who successfully removed the device. One device was not located at the final removal visit and was confirmed by imaging to not be present. This device was assumed to have been extruded shortly after the placement procedure. One patient experienced cellulitis at the application site, which was treated with topical and oral antibiotics. All events were assessed by investigators as mild in severity and none resulted in discontinuation of the patient from the study.

A small increase from baseline was observed for serum amylase ( $14.0 \pm 17.5$

units/L) and serum lipase ( $16.7 \pm 31.8$  units/L) at week 39, but these increases were within normal limits and did not correlate with clinical signs or symptoms (Supplementary Table 2). Positive ADAs were detected in 10 (16.7%) patients; the incidence was 16% at week 13 and decreased to 3.4% at week 39. The antibodies in three ADA-positive patients were found to cross-react with GLP-1 at week 13 and were subsequently negative. None of the ADA-positive samples cross-reacted with glucagon. Because of the small number of ADA-positive patients, no conclusion can be made about the impact of ADAs on the primary end point.

### CONCLUSIONS

Treatment with ITCA 650 for 39 weeks resulted in a significant and clinically meaningful reduction in HbA<sub>1c</sub> in poorly controlled patients with T2D receiving antidiabetes therapy or diet and exercise alone. The patient population was obese (65%) with an average duration of diabetes of 8.5 years and baseline HbA<sub>1c</sub> of 10.8% (94.7 mmol/mol), despite the majority being treated with one or more oral antidiabetes drugs. Background drug therapy was used by 70% of patients, and 20% had discontinued antidiabetes medications within the 12 months before screening. The addition of ITCA 650 resulted in 25% of patients achieving goal HbA<sub>1c</sub> <7% and 73% of patients having a reduction in HbA<sub>1c</sub> of  $\geq 2\%$ . One-third of patients received additional “rescue”

**Table 2—Incidence of treatment-emergent AEs occurring in >5% of patients or of special interest, safety population (N = 60)**

| Treatment-emergent AE             | n (%)     |
|-----------------------------------|-----------|
| Nausea                            | 21 (35.0) |
| Vomiting                          | 16 (26.7) |
| Diarrhea                          | 14 (23.3) |
| Application site bleeding         | 9 (15.0)  |
| Upper respiratory tract infection | 7 (11.7)  |
| Headache                          | 5 (8.3)   |
| Hypertension                      | 5 (8.3)   |
| Urinary tract infection           | 5 (8.3)   |
| Application site pain             | 4 (6.7)   |
| Constipation                      | 4 (6.7)   |
| Dyspepsia                         | 4 (6.7)   |
| Hypoglycemia, minor*              | 4 (6.7)   |

\*Minor hypoglycemia was defined as symptoms suggestive of hypoglycemia with a plasma glucose level <60 mg/dL.

therapy, usually after week 26 when protocol-defined rescue criteria required that HbA<sub>1c</sub> be  $\leq 8.5\%$ . Mean weight loss was modest and not statistically significant. Assessment of goal attainment and reductions in HbA<sub>1c</sub> and weight were made on data prior to the initiation of rescue therapy.

ITCA 650 was generally well tolerated. Consistent with the GLP-1 RA class, the most common AEs were gastrointestinal (nausea, vomiting, and diarrhea), which decreased over time and were associated with a low incidence of treatment discontinuation. There was a low incidence of minor hypoglycemia, and procedures to

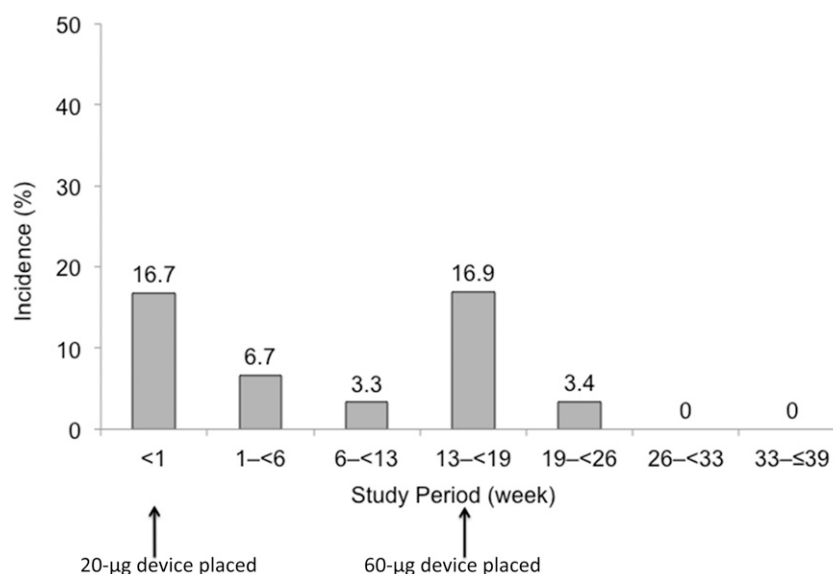

**Figure 2—Incidence of nausea over time to week 39.**

place and remove the ITCA 650 were well tolerated by patients.

Several open-label studies of patients with T2D and HbA<sub>1c</sub> levels >10% (86 mmol/mol), treated for 24 weeks with DPP-4 inhibitors or SGLT2 inhibitors combined with metformin (20–25), have reported reductions in HbA<sub>1c</sub> of similar magnitude to this study. However, in those studies a DPP-4 or SGLT2 inhibitor was started together with metformin, the duration of diabetes was generally shorter, and fewer than 20% of patients reached the American Diabetes Association target of <7%. The modest weight loss observed in this study relative to that reported in the phase 2 and phase 3 studies with ITCA 650 (17,19) and studies with exenatide (26) is likely due to the reversal of caloric losses in the urine as a result of the correction of severe hyperglycemia and is consistent with results of SGLT2 inhibitors in similar high baseline HbA<sub>1c</sub> populations (20,27).

Patients with HbA<sub>1c</sub> ≥10% represent 6.8% of the adult U.S. population with diabetes (1). Excessive hyperglycemia is commonly encountered in patients with diabetes in clinical practice and described in retrospective, population-based studies (28,29). In one study with patients taking multiple oral antidiabetes drugs, the baseline HbA<sub>1c</sub> was >11.8% (96 mmol/mol) in 12.3% of the group starting a GLP-1 agonist and 19.5% of those starting insulin (29). Guidelines generally recommend the initiation of insulin when glycemia reaches this level (30). Treatment of these patients may contribute disproportionately to the burden of diabetes (5).

Once ITCA 650 is placed, no action on the part of the patient is required in order to ensure therapeutic adherence for the 3- or 6-month dosing period. The potential for complete adherence to treatment when the ITCA 650 is in place, combined with the observed treatment effects, may address a key challenge that has profound implications for patients, health care professionals, and payers.

Limitations of this study are the open-label design and relatively small sample size. However, the primary result, although of greater magnitude, is consistent with that of the randomized, double-blind, placebo-controlled trial (FREEDOM-1) (19) for which these patients were originally screened. The patients in the current study met all inclusion/exclusion criteria for FREEDOM-1 except for the level of

hyperglycemia at baseline. As such, the limitations noted are not likely to diminish the conclusion from these data.

In this population of patients with longstanding diabetes and severe hyperglycemia, treatment with ITCA 650 was well tolerated and resulted in a significant and sustained reduction in HbA<sub>1c</sub>.

**Acknowledgments.** The authors would like to acknowledge the editorial assistance of Richard S. Perry, PharmD, RP Consulting, in the preparation of this manuscript, which was supported by Intarcia Therapeutics, Inc. Kristal Pennington, Intarcia Therapeutics, Inc., provided invaluable data management for this study.

**Duality of Interest.** This study was funded by Intarcia Therapeutics, Inc., Boston, MA. R.R.H. reports grants from AstraZeneca, AstraZeneca, Hitachi, Eli Lilly, Lexicon, Novo Nordisk, and Viacyte; has served on advisory boards and acted as a consultant for AstraZeneca, Intarcia, Johnson & Johnson/Janssen, and Sanofi-Aventis; has served on scientific advisory boards for Boehringer Ingelheim, Elcelyx, and Sanofi; and has acted as a consultant for Alere and Ionis. J.R. has served on scientific advisory boards and received honoraria or consulting fees from Eli Lilly, Novo Nordisk, Sanofi, Daiichi Sankyo, Janssen, Boehringer Ingelheim, AstraZeneca, and Intarcia; he has received grants/research support from Merck, Pfizer, Sanofi, Novo Nordisk, Bristol-Myers Squibb, Eli Lilly, GlaxoSmithKline, Takeda, AstraZeneca, Hanmi, Janssen, Daiichi Sankyo, Asahi, Boehringer Ingelheim, Intarcia, and Lexicon. D.S.D. was an investigator for Intarcia Therapeutics, Inc. P.P., L.K., and M.A.B. are full-time employees of Intarcia Therapeutics, Inc., and hold stock in the company.

**Author Contributions.** R.R.H., J.R., D.S.D., and M.A.B. contributed to study design and conduct of the study. All authors reviewed, revised, and edited the manuscript for intellectual content, and all authors approved the manuscript for submission to the journal. R.R.H. is the guarantor of this work and, as such, had full access to all the data in the study and takes responsibility for the integrity of the data and the accuracy of the data analysis.

## References

1. Ali MK, Bullard KM, Saaddine JB, Cowie CC, Imperatore G, Gregg EW. Achievement of goals in U.S. diabetes care, 1999–2010. *N Engl J Med* 2013;368:1613–1624
2. Ford ES. Trends in the control of risk factors for cardiovascular disease among adults with diagnosed diabetes: findings from the National Health and Nutrition Examination Survey 1999–2008. *J Diabetes* 2011;3:337–347
3. Ali MK, McKeever Bullard K, Imperatore G, Barker L, Gregg EW; Centers for Disease Control and Prevention. Characteristics associated with poor glycemic control among adults with self-reported diagnosed diabetes—National Health and Nutrition Examination Survey, United States, 2007–2010. *MMWR* 2012;61(Suppl. 15 June):32–37
4. Stark Casagrande S, Fradkin JE, Saydah SH, Rust KF, Cowie CC. The prevalence of meeting A1C, blood pressure, and LDL goals among people

with diabetes, 1988–2010. *Diabetes Care* 2013;36:2271–2279

5. Aronson R, Orzech N, Ye C, Goldenberg R, Brown V. Specialist-led diabetes registries and predictors of poor glycemic control in type 2 diabetes: insights into the functionally refractory patient from the LMC Diabetes Registry database. *J Diabetes* 2016;8:76–85

6. Alatorre C, Fernández Landó L, Yu M, et al. Treatment patterns in patients with type 2 diabetes mellitus treated with glucagon-like peptide-1 receptor agonists: higher adherence and persistence with dulaglutide compared with once-weekly exenatide and liraglutide. *Diabetes Obes Metab* 2017;19:953–961

7. Cheung BM, Ong KL, Cherny SS, Sham PC, Tso AW, Lam KS. Diabetes prevalence and therapeutic target achievement in the United States, 1999 to 2006. *Am J Med* 2009;122:443–453

8. Egede LE, Gebregziabher M, Echols C, Lynch CP. Longitudinal effects of medication nonadherence on glycemic control. *Ann Pharmacother* 2014;48:562–570

9. Rozenfeld Y, Hunt JS, Plauschinat C, Wong KS. Oral antidiabetic medication adherence and glycemic control in managed care. *Am J Manag Care* 2008;14:71–75

10. Nauck M. Incretin therapies: highlighting common features and differences in the modes of action of glucagon-like peptide-1 receptor agonists and dipeptidyl peptidase-4 inhibitors. *Diabetes Obes Metab* 2016;18:203–216

11. Kjems LL, Holst JJ, Vølund A, Madsbad S. The influence of GLP-1 on glucose-stimulated insulin secretion: effects on beta-cell sensitivity in type 2 and nondiabetic subjects. *Diabetes* 2003;52:380–386

12. Buysman EK, Liu F, Hammer M, Langer J. Impact of medication adherence and persistence on clinical and economic outcomes in patients with type 2 diabetes treated with liraglutide: a retrospective cohort study. *Adv Ther* 2015;32:341–355

13. Wilke T, Mueller S, Groth A, et al. Non-persistence and non-adherence of patients with type 2 diabetes mellitus in therapy with GLP-1 receptor agonists: a retrospective analysis. *Diabetes Ther* 2016;7:105–124

14. Rohloff CM, Alessi TR, Yang B, Dahms J, Carr JP, Lautenbach SD. DUROS technology delivers peptides and proteins at consistent rate continuously for 3 to 12 months. *J Diabetes Sci Technol* 2008;2:461–467

15. Yang B, Negulescu C, D'vaz R, et al. Stability of ITCA 650 for continuous subcutaneous delivery of exenatide at body temperature for 12 months. Abstract No. A189 presented at the Ninth Annual Diabetes Technology Meeting, 5–7 November 2009, San Francisco, CA

16. Henry RR, Logan D, Alessi T, Baron MA. A randomized, open-label, multicenter, 4-week study to evaluate the tolerability and pharmacokinetics of ITCA 650 in patients with type 2 diabetes. *Clin Ther* 2013;35:634–645.e1

17. Henry RR, Rosenstock J, Logan DK, Alessi TR, Luskey K, Baron MA. Randomized trial of continuous subcutaneous delivery of exenatide by ITCA 650 versus twice-daily exenatide injections in metformin-treated type 2 diabetes [published correction appears in *Diabetes Care* 2014;37:312]. *Diabetes Care* 2013;36:2559–2565

18. Henry RR, Rosenstock J, Logan D, Alessi T, Luskey K, Baron MA. Continuous subcutaneous

delivery of exenatide via ITCA 650 leads to sustained glycemic control and weight loss for 48 weeks in metformin-treated subjects with type 2 diabetes. *J Diabetes Complications* 2014;28:393–398

19. Rosenstock J, Buse JB, Azeem R, et al. Efficacy and safety of ITCA 650, a novel drug-device GLP-1 receptor agonist, in type 2 diabetes uncontrolled with oral antidiabetes drugs: the FREEDOM-1 Trial. *Diabetes Care* 2018;41:333–340

20. Häring H-U, Merker L, Seewaldt-Becker E, et al.; EMPA-REG MET Trial Investigators. Empagliflozin as add-on to metformin in patients with type 2 diabetes: a 24-week, randomized, double-blind, placebo-controlled trial. *Diabetes Care* 2014;37:1650–1659

21. Häring HU, Merker L, Seewaldt-Becker E, et al.; EMPA-REG METSU Trial Investigators. Empagliflozin as add-on to metformin plus sulfonylurea in patients with type 2 diabetes: a 24-week, randomized, double-blind, placebo-controlled trial. *Diabetes Care* 2013;36:3396–3404

22. Goldstein BJ, Feinglos MN, Luncsford JK, Johnson J, Williams-Herman DE; Sitagliptin 036

Study Group. Effect of initial combination therapy with sitagliptin, a dipeptidyl peptidase-4 inhibitor, and metformin on glycemic control in patients with type 2 diabetes. *Diabetes Care* 2007;30:1979–1987

23. Roden M, Weng J, Eilbracht J, et al.; EMPA-REG MONO trial investigators. Empagliflozin monotherapy with sitagliptin as an active comparator in patients with type 2 diabetes: a randomized, double-blind, placebo-controlled, phase 3 trial. *Lancet Diabetes Endocrinol* 2013;1:208–219

24. Rosenstock J, Aguilar-Salinas C, Klein E, Nepal S, List J, Chen R; CV181-011 Study Investigators. Effect of saxagliptin monotherapy in treatment-naïve patients with type 2 diabetes. *Curr Med Res Opin* 2009;25:2401–2411

25. Stenlöf K, Cefalu WT, Kim KA, et al. Efficacy and safety of canagliflozin monotherapy in subjects with type 2 diabetes mellitus inadequately controlled with diet and exercise. *Diabetes Obes Metab* 2013;15:372–382

26. Buse JB, Nauck M, Forst T, et al. Exenatide once weekly versus liraglutide once daily in

patients with type 2 diabetes (DURATION-6): a randomised, open-label study. *Lancet* 2013;381:117–124

27. Ferrannini E, Ramos SJ, Salsali A, Tang W, List JF. Dapagliflozin monotherapy in type 2 diabetic patients with inadequate glycemic control by diet and exercise: a randomized, double-blind, placebo-controlled, phase 3 trial. *Diabetes Care* 2010;33:2217–2224

28. Calvert M, Shankar A, McManus RJ, Lester H, Freemantle N. Effect of the quality and outcomes framework on diabetes care in the United Kingdom: retrospective cohort study [published correction appears in *BMJ* 2009;339:b2768]. *BMJ* 2009;338:b1870

29. Hall GC, McMahon AD, Dain MP, Wang E, Home PD. Primary-care observational database study of the efficacy of GLP-1 receptor agonists and insulin in the UK. *Diabet Med* 2013;30:681–686

30. American Diabetes Association. Pharmacologic approaches to glycemic treatment. Sec. 8. In *Standards of Medical Care in Diabetes—2017*. *Diabetes Care* 2017;40(Suppl. 1):S64–S74
